# Supplementary material for: Understanding the molecular mechanism of the stereoselective conversion of N-trialkylsilyloxy nitronates into bicyclic isoxazoline derivatives
Source: Royal Society of Chemistry journal article supplement (doi:10.1039/d1nj01198g), 2021-01-01
Supplement: d1nj01198g1.pdf [file d1nj01198g1.pdf]

## SUPPLEMENTARY MATERIAL

### Understanding the molecular mechanism of the stereoselective conversion of N-trialkylsilyloxy nitronates into bicyclic isoxazoline derivatives

Agnieszka Kącka-Zych<sup>\*a</sup>, Radomir Jasiński<sup>a</sup>

<sup>a</sup>Cracow University of Technology, Institute of Organic Chemistry and Technology, Warszawska 24, 31-155

Cracow, Poland

e-mail: agnieszka.kacka-zych@pk.edu.pl

---

#### [1] Key structures for model reaction involving nitronate 1a

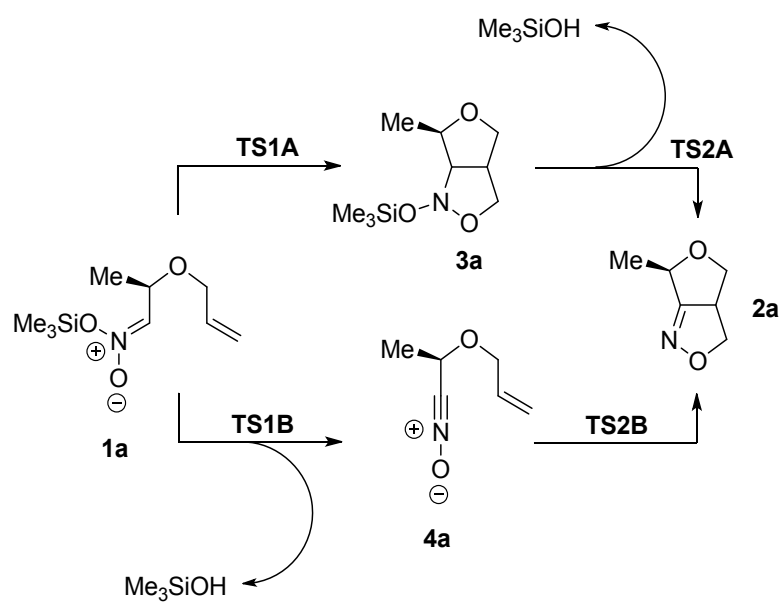

**1a**

---

| Center<br>Number | Atomic<br>Number | Atomic<br>Type | Coordinates (Angstroms) |           |           |
|------------------|------------------|----------------|-------------------------|-----------|-----------|
|                  |                  |                | X                       | Y         | Z         |
| 1                | 6                | 0              | 2.455500                | -0.981739 | -0.162662 |
| 2                | 8                | 0              | 3.399264                | -0.083322 | 0.402770  |
| 3                | 6                | 0              | 3.262407                | 1.259684  | -0.031307 |
| 4                | 6                | 0              | 2.021042                | 1.943708  | 0.466800  |
| 5                | 6                | 0              | 1.149372                | -0.902576 | 0.566700  |
| 6                | 1                | 0              | 2.276223                | -0.724683 | -1.212684 |
| 7                | 1                | 0              | 4.147647                | 1.767498  | 0.360163  |
| 8                | 1                | 0              | 3.298489                | 1.308620  | -1.129134 |
| 9                | 1                | 0              | 1.881104                | 1.950682  | 1.545595  |
| 10               | 1                | 0              | 1.069957                | -1.105427 | 1.623983  |
| 11               | 6                | 0              | 1.138926                | 2.535051  | -0.328523 |
| 12               | 1                | 0              | 0.265845                | 3.042184  | 0.066018  |
| 13               | 1                | 0              | 1.255138                | 2.522425  | -1.407875 |
| 14               | 6                | 0              | 3.056379                | -2.374979 | -0.058742 |
| 15               | 1                | 0              | 2.375857                | -3.116679 | -0.482535 |
| 16               | 1                | 0              | 4.003717                | -2.409491 | -0.599392 |
| 17               | 1                | 0              | 3.244537                | -2.627040 | 0.987865  |
| 18               | 8                | 0              | -0.112443               | -0.279619 | -1.237890 |
| 19               | 7                | 0              | 0.053583                | -0.576205 | -0.038735 |
| 20               | 8                | 0              | -1.060231               | -0.522007 | 0.770034  |
| 21               | 14               | 0              | -2.572994               | -0.055139 | 0.054067  |
| 22               | 6                | 0              | -2.507443               | 1.698896  | -0.571122 |
| 23               | 1                | 0              | -2.216090               | 2.384229  | 0.229517  |
| 24               | 1                | 0              | -1.791074               | 1.793549  | -1.388061 |
| 25               | 1                | 0              | -3.495562               | 2.003669  | -0.930786 |
| 26               | 6                | 0              | -3.108646               | -1.281313 | -1.242739 |
| 27               | 1                | 0              | -3.016739               | -2.304046 | -0.866561 |
| 28               | 1                | 0              | -4.159638               | -1.112151 | -1.498225 |
| 29               | 1                | 0              | -2.507950               | -1.191282 | -2.148421 |
| 30               | 6                | 0              | -3.656069               | -0.178681 | 1.568728  |
| 31               | 1                | 0              | -4.689992               | 0.070499  | 1.310270  |
| 32               | 1                | 0              | -3.647971               | -1.189601 | 1.984103  |
| 33               | 1                | 0              | -3.328193               | 0.513694  | 2.348272  |

---

**TS1A**

---

| Center<br>Number | Atomic<br>Number | Atomic<br>Type | Coordinates (Angstroms) |           |           |
|------------------|------------------|----------------|-------------------------|-----------|-----------|
|                  |                  |                | X                       | Y         | Z         |
| 1                | 6                | 0              | -2.529237               | 0.864126  | -0.251487 |
| 2                | 8                | 0              | -3.572607               | 0.101488  | 0.313887  |
| 3                | 6                | 0              | -3.230720               | -1.275335 | 0.223089  |
| 4                | 6                | 0              | -1.771190               | -1.514270 | 0.551899  |
| 5                | 6                | 0              | -1.274253               | 0.498630  | 0.506259  |
| 6                | 1                | 0              | -2.384989               | 0.598843  | -1.307647 |
| 7                | 1                | 0              | -3.892323               | -1.800704 | 0.913116  |
| 8                | 1                | 0              | -3.432885               | -1.632648 | -0.796416 |
| 9                | 1                | 0              | -1.516913               | -1.645764 | 1.600256  |
| 10               | 1                | 0              | -1.190928               | 0.869911  | 1.522059  |
| 11               | 6                | 0              | -0.943251               | -2.085482 | -0.394841 |
| 12               | 1                | 0              | -0.004640               | -2.544800 | -0.112429 |
| 13               | 1                | 0              | -1.315858               | -2.319781 | -1.384244 |
| 14               | 6                | 0              | -2.885545               | 2.332079  | -0.117733 |
| 15               | 1                | 0              | -2.090408               | 2.954697  | -0.532966 |
| 16               | 1                | 0              | -3.813010               | 2.539032  | -0.654646 |
| 17               | 1                | 0              | -3.027909               | 2.592176  | 0.934079  |
| 18               | 8                | 0              | -0.017813               | -0.289627 | -1.184000 |
| 19               | 7                | 0              | -0.103299               | 0.396977  | -0.128487 |
| 20               | 8                | 0              | 0.979975                | 0.317491  | 0.744898  |
| 21               | 14               | 0              | 2.553028                | 0.121255  | 0.073110  |
| 22               | 6                | 0              | 2.834934                | -1.629060 | -0.508493 |
| 23               | 1                | 0              | 2.589407                | -2.345880 | 0.280388  |
| 24               | 1                | 0              | 2.222988                | -1.854594 | -1.383499 |
| 25               | 1                | 0              | 3.888144                | -1.771437 | -0.771450 |
| 26               | 6                | 0              | 2.808617                | 1.365475  | -1.292562 |
| 27               | 1                | 0              | 2.668013                | 2.385587  | -0.925060 |
| 28               | 1                | 0              | 3.824706                | 1.285420  | -1.690995 |
| 29               | 1                | 0              | 2.105745                | 1.191768  | -2.109910 |
| 30               | 6                | 0              | 3.611335                | 0.491996  | 1.563788  |
| 31               | 1                | 0              | 4.670238                | 0.370807  | 1.315437  |
| 32               | 1                | 0              | 3.459284                | 1.515865  | 1.914182  |
| 33               | 1                | 0              | 3.381456                | -0.188681 | 2.387806  |

---

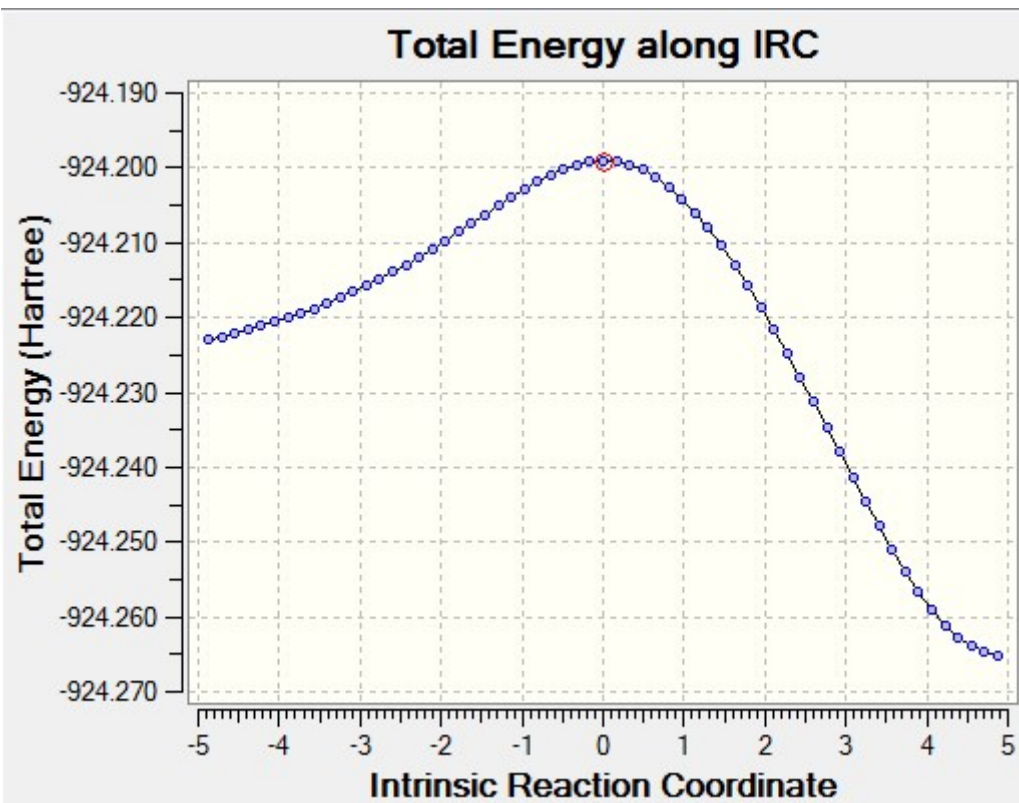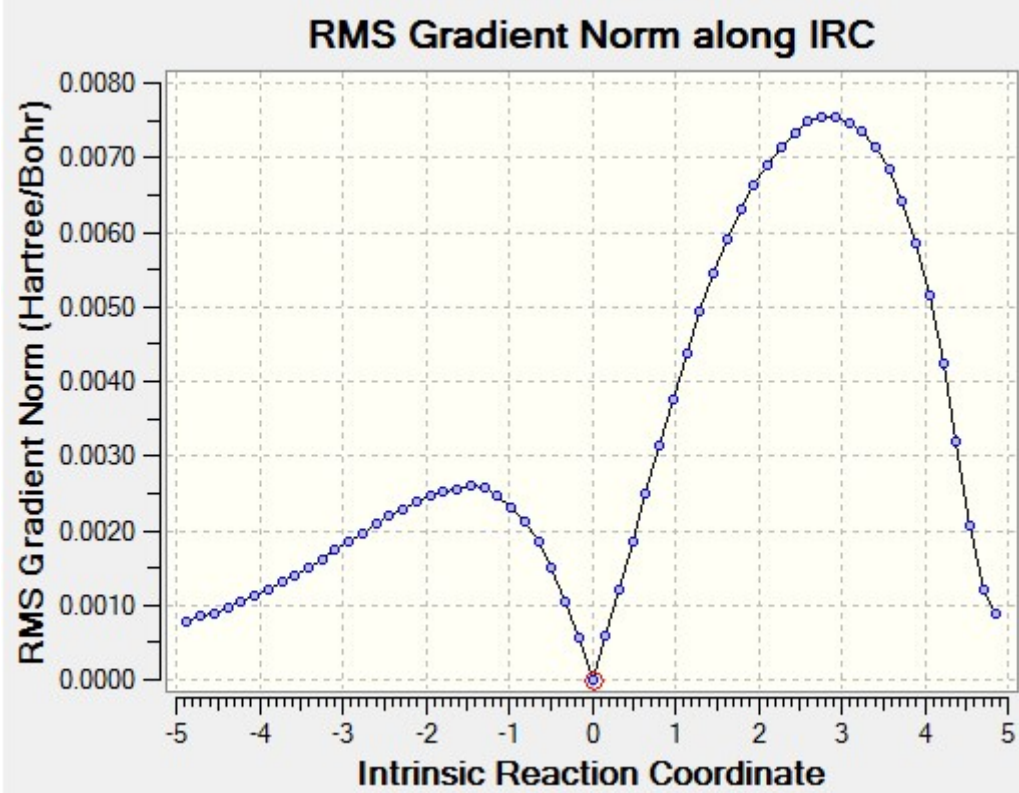

**3a**

---

| Center<br>Number | Atomic<br>Number | Atomic<br>Type | Coordinates (Angstroms) |           |           |
|------------------|------------------|----------------|-------------------------|-----------|-----------|
|                  |                  |                | X                       | Y         | Z         |
| 1                | 6                | 0              | -2.230184               | 1.040019  | -0.337138 |
| 2                | 8                | 0              | -3.500545               | 0.530860  | 0.033017  |
| 3                | 6                | 0              | -3.352181               | -0.873641 | 0.103356  |
| 4                | 6                | 0              | -1.974641               | -1.124063 | 0.745631  |
| 5                | 6                | 0              | -1.232509               | 0.206282  | 0.483314  |
| 6                | 1                | 0              | -2.046413               | 0.832200  | -1.401972 |
| 7                | 1                | 0              | -4.183805               | -1.272949 | 0.683555  |
| 8                | 1                | 0              | -3.382156               | -1.309115 | -0.906478 |
| 9                | 1                | 0              | -2.058851               | -1.346548 | 1.808163  |
| 10               | 1                | 0              | -0.908102               | 0.725052  | 1.382503  |
| 11               | 6                | 0              | -1.089179               | -2.125504 | 0.014738  |
| 12               | 1                | 0              | -0.384977               | -2.618182 | 0.688550  |
| 13               | 1                | 0              | -1.637611               | -2.871263 | -0.560869 |
| 14               | 6                | 0              | -2.176880               | 2.527005  | -0.076266 |
| 15               | 1                | 0              | -1.187613               | 2.913468  | -0.333553 |
| 16               | 1                | 0              | -2.922248               | 3.052369  | -0.676015 |
| 17               | 1                | 0              | -2.370501               | 2.731066  | 0.980113  |
| 18               | 8                | 0              | -0.374777               | -1.325982 | -0.943636 |
| 19               | 7                | 0              | -0.040062               | -0.123817 | -0.312732 |
| 20               | 8                | 0              | 0.995515                | -0.414706 | 0.621761  |
| 21               | 14               | 0              | 2.493231                | 0.161027  | 0.043716  |
| 22               | 6                | 0              | 2.890854                | -0.642048 | -1.593465 |
| 23               | 1                | 0              | 2.976866                | -1.726348 | -1.485261 |
| 24               | 1                | 0              | 2.103409                | -0.437438 | -2.322859 |
| 25               | 1                | 0              | 3.836441                | -0.261050 | -1.991761 |
| 26               | 6                | 0              | 2.402573                | 2.020025  | -0.124852 |
| 27               | 1                | 0              | 2.166164                | 2.492016  | 0.832986  |
| 28               | 1                | 0              | 3.355678                | 2.427179  | -0.476169 |
| 29               | 1                | 0              | 1.629652                | 2.299391  | -0.845463 |
| 30               | 6                | 0              | 3.692783                | -0.354180 | 1.377037  |
| 31               | 1                | 0              | 4.709503                | -0.045307 | 1.115199  |
| 32               | 1                | 0              | 3.439811                | 0.102893  | 2.337311  |
| 33               | 1                | 0              | 3.694586                | -1.439826 | 1.505857  |

---

**TS2A**

---

| Center<br>Number | Atomic<br>Number | Atomic<br>Type | Coordinates (Angstroms) |           |           |
|------------------|------------------|----------------|-------------------------|-----------|-----------|
|                  |                  |                | X                       | Y         | Z         |
| 1                | 6                | 0              | 2.237894                | 1.268667  | 0.467669  |
| 2                | 8                | 0              | 3.519846                | 0.908225  | -0.050299 |
| 3                | 6                | 0              | 3.565377                | -0.482547 | -0.302028 |
| 4                | 6                | 0              | 2.169464                | -0.823284 | -0.833610 |
| 5                | 6                | 0              | 1.315877                | 0.124423  | 0.006369  |
| 6                | 1                | 0              | 2.278357                | 1.290694  | 1.563234  |
| 7                | 1                | 0              | 4.369183                | -0.667495 | -1.013743 |
| 8                | 1                | 0              | 3.772461                | -1.044444 | 0.622225  |
| 9                | 1                | 0              | 2.076062                | -0.623077 | -1.899177 |
| 10               | 1                | 0              | 0.271920                | 0.398670  | -0.461085 |
| 11               | 6                | 0              | 1.578922                | -2.159198 | -0.459645 |
| 12               | 1                | 0              | 0.770311                | -2.471441 | -1.118754 |
| 13               | 1                | 0              | 2.274135                | -2.974216 | -0.268873 |
| 14               | 6                | 0              | 1.848967                | 2.627000  | -0.073047 |
| 15               | 1                | 0              | 0.891126                | 2.936739  | 0.350605  |
| 16               | 1                | 0              | 2.606449                | 3.367230  | 0.190458  |
| 17               | 1                | 0              | 1.756874                | 2.588475  | -1.160912 |
| 18               | 8                | 0              | 0.933115                | -1.884750 | 0.846234  |
| 19               | 7                | 0              | 0.762938                | -0.646083 | 1.045785  |
| 20               | 8                | 0              | -1.103025               | -0.227173 | -0.273598 |
| 21               | 14               | 0              | -2.691902               | 0.104826  | -0.086433 |
| 22               | 6                | 0              | -3.517141               | -1.247162 | 0.936585  |
| 23               | 1                | 0              | -3.435985               | -2.218875 | 0.439694  |
| 24               | 1                | 0              | -3.043533               | -1.333331 | 1.919438  |
| 25               | 1                | 0              | -4.580550               | -1.036405 | 1.092495  |
| 26               | 6                | 0              | -2.969452               | 1.746455  | 0.802806  |
| 27               | 1                | 0              | -2.539456               | 2.580018  | 0.237551  |
| 28               | 1                | 0              | -4.036213               | 1.952402  | 0.941347  |
| 29               | 1                | 0              | -2.499517               | 1.736215  | 1.791544  |
| 30               | 6                | 0              | -3.578641               | 0.202214  | -1.749623 |
| 31               | 1                | 0              | -4.644373               | 0.416461  | -1.614992 |
| 32               | 1                | 0              | -3.156000               | 0.991296  | -2.379659 |
| 33               | 1                | 0              | -3.492278               | -0.743717 | -2.293375 |

---

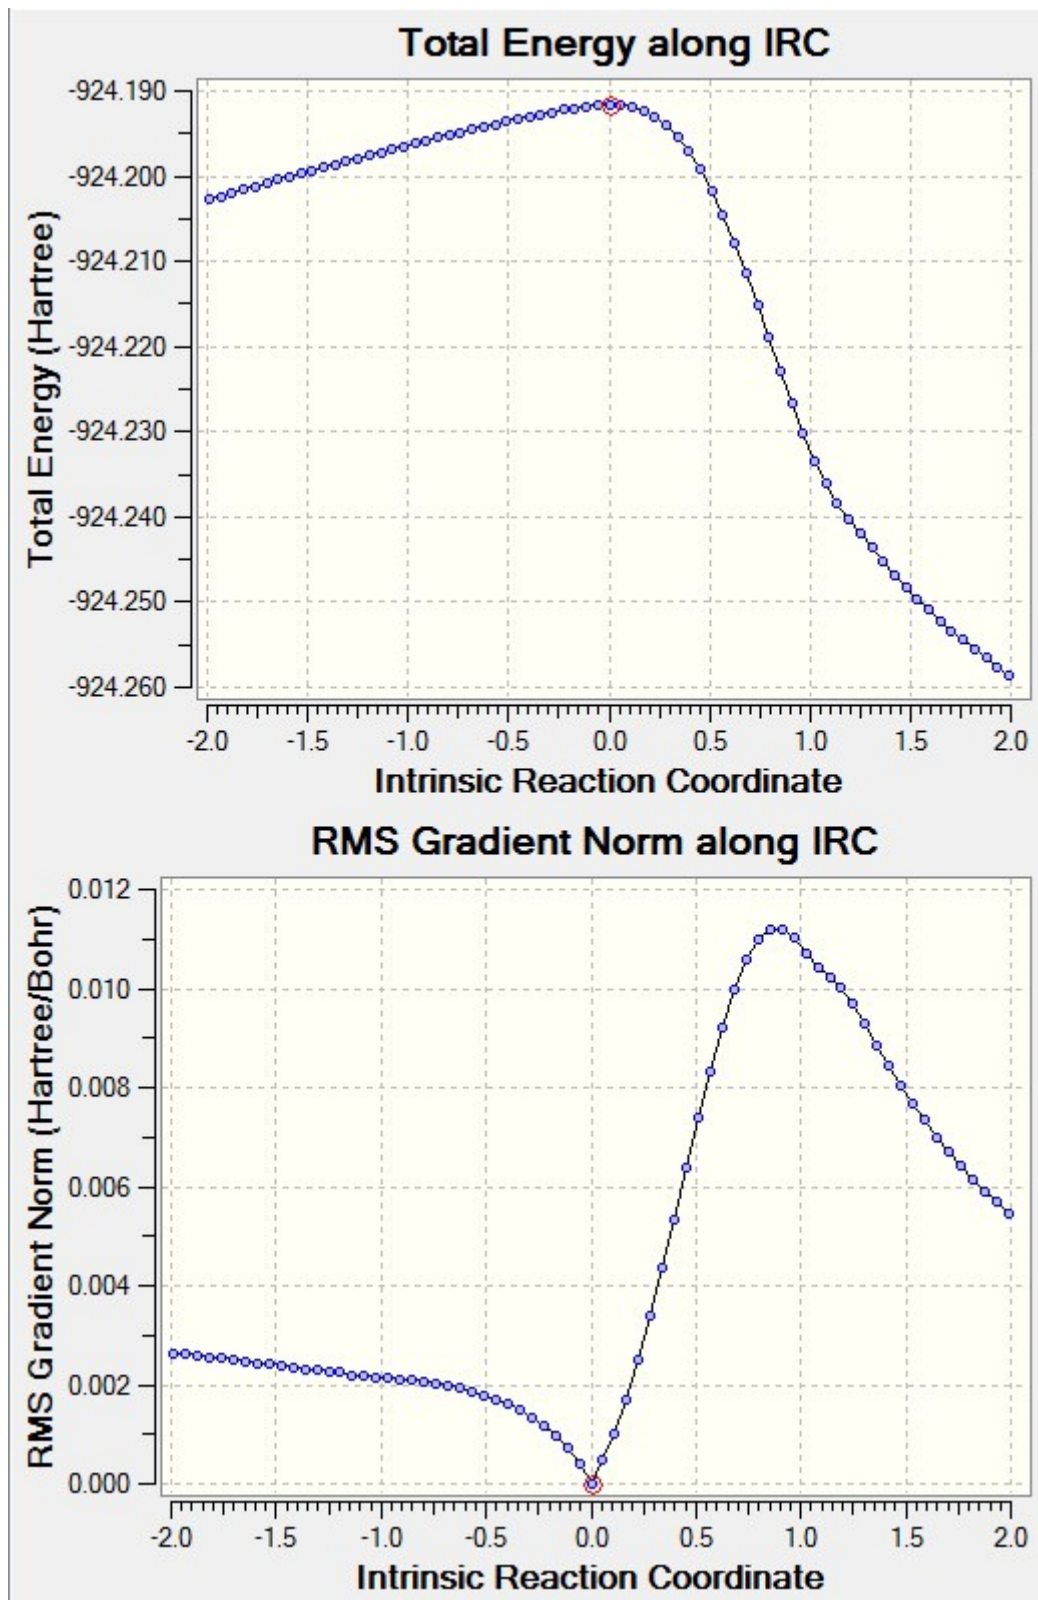

**2a**

---

| Center<br>Number | Atomic<br>Number | Atomic<br>Type | Coordinates (Angstroms) |           |           |
|------------------|------------------|----------------|-------------------------|-----------|-----------|
|                  |                  |                | X                       | Y         | Z         |
| 1                | 6                | 0              | 1.376413                | -0.342775 | -0.416660 |
| 2                | 8                | 0              | 1.556473                | 1.069397  | -0.226223 |
| 3                | 6                | 0              | 0.290408                | 1.728807  | -0.161295 |
| 4                | 6                | 0              | -0.620148               | 0.721593  | 0.539301  |
| 5                | 6                | 0              | -0.070944               | -0.531196 | -0.073113 |
| 6                | 1                | 0              | 1.543153                | -0.594915 | -1.470354 |
| 7                | 1                | 0              | 0.440393                | 2.661738  | 0.380151  |
| 8                | 1                | 0              | -0.088140               | 1.951845  | -1.168593 |
| 9                | 1                | 0              | -0.441234               | 0.733045  | 1.619590  |
| 10               | 6                | 0              | -2.078921               | 0.513428  | 0.179174  |
| 11               | 1                | 0              | -2.785804               | 0.784745  | 0.960041  |
| 12               | 1                | 0              | -2.344242               | 1.016348  | -0.758626 |
| 13               | 6                | 0              | 2.347184                | -1.102378 | 0.468100  |
| 14               | 1                | 0              | 2.240677                | -2.176625 | 0.302956  |
| 15               | 1                | 0              | 3.371554                | -0.808641 | 0.231945  |
| 16               | 1                | 0              | 2.154738                | -0.884228 | 1.520757  |
| 17               | 8                | 0              | -2.189073               | -0.920269 | -0.022381 |
| 18               | 7                | 0              | -0.927749               | -1.400172 | -0.406011 |

---

**Me<sub>3</sub>SiOH**

---

| Center<br>Number | Atomic<br>Number | Atomic<br>Type | Coordinates (Angstroms) |           |           |
|------------------|------------------|----------------|-------------------------|-----------|-----------|
|                  |                  |                | X                       | Y         | Z         |
| 1                | 1                | 0              | 0.649960                | -0.002063 | 2.216196  |
| 2                | 8                | 0              | -0.156646               | -0.005084 | 1.702780  |
| 3                | 14               | 0              | -0.007230               | -0.000085 | 0.034061  |
| 4                | 6                | 0              | 0.905692                | 1.533573  | -0.536975 |
| 5                | 1                | 0              | 0.375818                | 2.443280  | -0.240728 |
| 6                | 1                | 0              | 1.915837                | 1.579689  | -0.117965 |
| 7                | 1                | 0              | 1.001757                | 1.540038  | -1.627445 |
| 8                | 6                | 0              | 0.924795                | -1.519903 | -0.543147 |
| 9                | 1                | 0              | 0.406121                | -2.437250 | -0.250713 |
| 10               | 1                | 0              | 1.021823                | -1.520974 | -1.633529 |
| 11               | 1                | 0              | 1.935095                | -1.554770 | -0.123399 |
| 12               | 6                | 0              | -1.759652               | -0.009181 | -0.604350 |
| 13               | 1                | 0              | -1.776364               | -0.005301 | -1.698376 |
| 14               | 1                | 0              | -2.294666               | -0.898809 | -0.261283 |
| 15               | 1                | 0              | -2.306005               | 0.871079  | -0.255018 |

---



**TS1B**

---

| Center<br>Number | Atomic<br>Number | Atomic<br>Type | Coordinates (Angstroms) |           |           |
|------------------|------------------|----------------|-------------------------|-----------|-----------|
|                  |                  |                | X                       | Y         | Z         |
| 1                | 6                | 0              | -2.645667               | -0.956006 | 0.024456  |
| 2                | 8                | 0              | -2.939268               | -0.139418 | -1.066952 |
| 3                | 6                | 0              | -3.002416               | 1.257597  | -0.788937 |
| 4                | 6                | 0              | -1.663725               | 1.875652  | -0.506274 |
| 5                | 6                | 0              | -1.124169               | -0.960751 | 0.259052  |
| 6                | 1                | 0              | -3.134275               | -0.579999 | 0.933295  |
| 7                | 1                | 0              | -3.431829               | 1.692409  | -1.693559 |
| 8                | 1                | 0              | -3.695465               | 1.442196  | 0.043082  |
| 9                | 1                | 0              | -0.890766               | 1.700512  | -1.251221 |
| 10               | 1                | 0              | -0.216941               | -1.241627 | -0.405390 |
| 11               | 6                | 0              | -1.405292               | 2.616755  | 0.563625  |
| 12               | 1                | 0              | -0.434179               | 3.074291  | 0.714840  |
| 13               | 1                | 0              | -2.159826               | 2.800863  | 1.323650  |
| 14               | 6                | 0              | -3.100224               | -2.368310 | -0.290957 |
| 15               | 1                | 0              | -2.853930               | -3.045680 | 0.528629  |
| 16               | 1                | 0              | -4.180458               | -2.367973 | -0.443565 |
| 17               | 1                | 0              | -2.614265               | -2.721473 | -1.201901 |
| 18               | 8                | 0              | -0.357244               | -0.083286 | 2.330033  |
| 19               | 7                | 0              | -0.608938               | -0.549516 | 1.300267  |
| 20               | 8                | 0              | 1.262189                | -1.067121 | 0.047097  |
| 21               | 14               | 0              | 2.582667                | -0.161379 | -0.256143 |
| 22               | 6                | 0              | 2.143370                | 1.459123  | -1.126112 |
| 23               | 1                | 0              | 1.633100                | 1.273152  | -2.077248 |
| 24               | 1                | 0              | 1.480988                | 2.069121  | -0.502464 |
| 25               | 1                | 0              | 3.037293                | 2.054448  | -1.340660 |
| 26               | 6                | 0              | 3.430438                | 0.292236  | 1.367250  |
| 27               | 1                | 0              | 3.759360                | -0.604553 | 1.900804  |
| 28               | 1                | 0              | 4.309506                | 0.921053  | 1.189775  |
| 29               | 1                | 0              | 2.753215                | 0.844957  | 2.026063  |
| 30               | 6                | 0              | 3.827481                | -1.068340 | -1.341771 |
| 31               | 1                | 0              | 4.707615                | -0.446811 | -1.538936 |
| 32               | 1                | 0              | 4.166072                | -1.989676 | -0.858396 |
| 33               | 1                | 0              | 3.385811                | -1.338421 | -2.306073 |

---

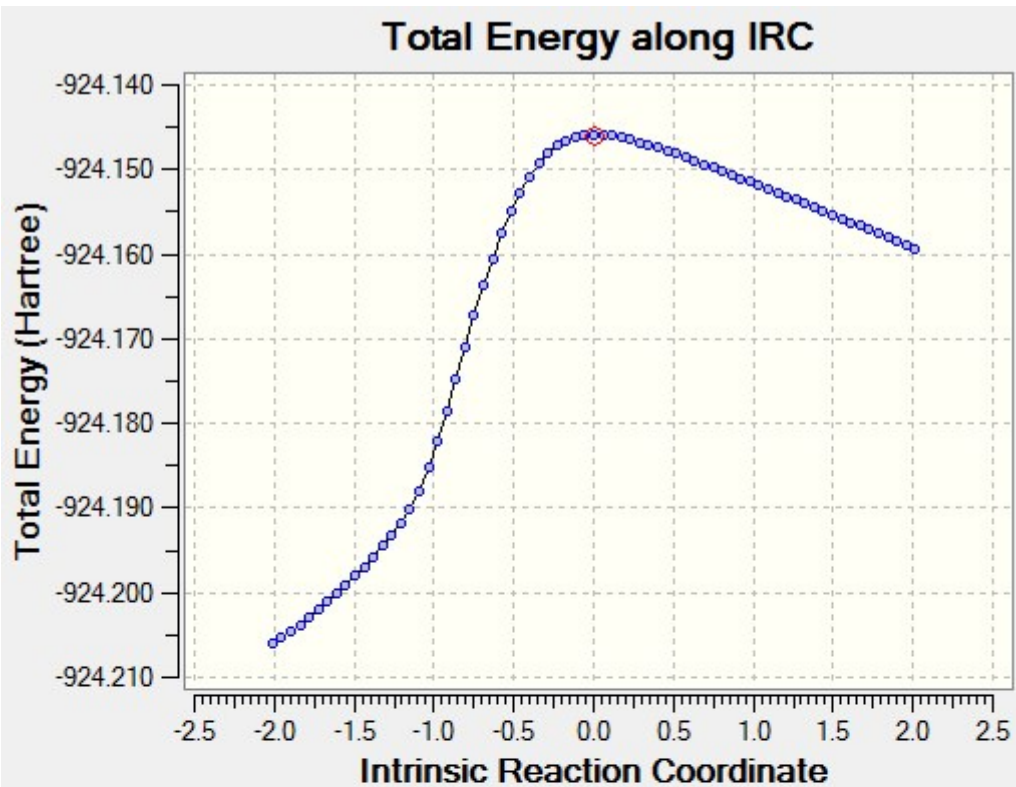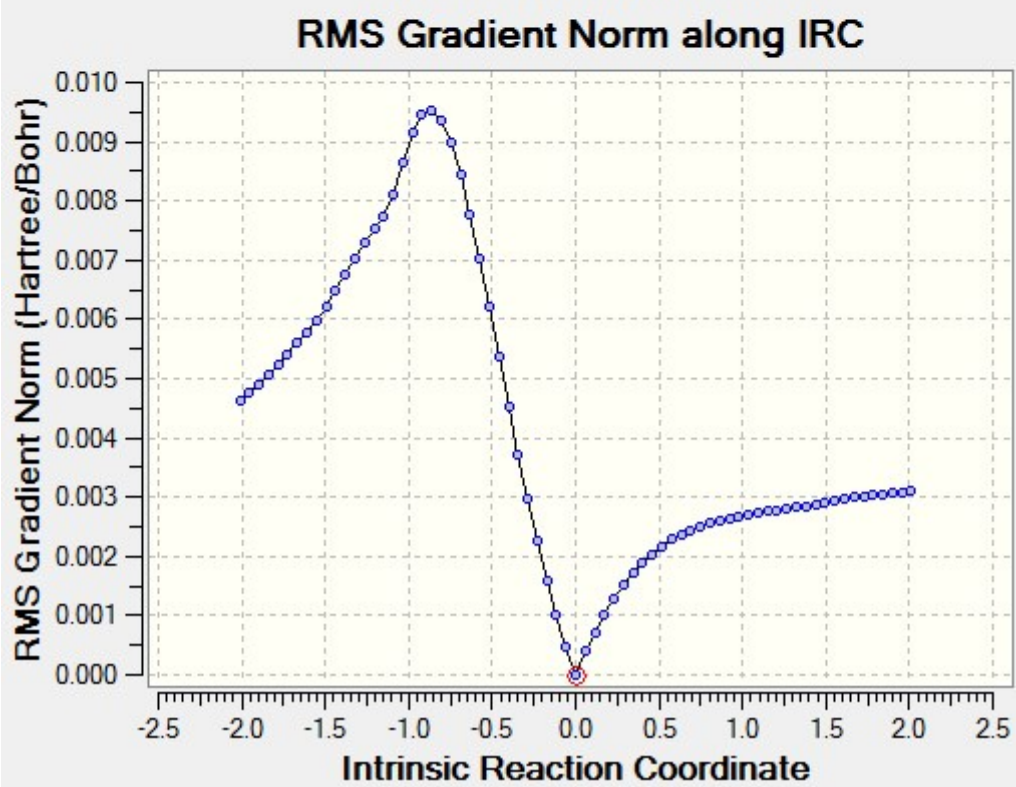

**4a**

---

| Center<br>Number | Atomic<br>Number | Atomic<br>Type | Coordinates (Angstroms) |           |           |
|------------------|------------------|----------------|-------------------------|-----------|-----------|
|                  |                  |                | X                       | Y         | Z         |
| 1                | 6                | 0              | 0.514458                | -1.097822 | 0.360879  |
| 2                | 8                | 0              | -0.504743               | -1.397453 | -0.560873 |
| 3                | 6                | 0              | -1.784845               | -0.868516 | -0.237824 |
| 4                | 6                | 0              | -1.875391               | 0.623558  | -0.373056 |
| 5                | 6                | 0              | 1.077940                | 0.255217  | 0.135899  |
| 6                | 1                | 0              | 0.109871                | -1.109774 | 1.382719  |
| 7                | 1                | 0              | -2.463149               | -1.350242 | -0.945538 |
| 8                | 1                | 0              | -2.074706               | -1.176265 | 0.776860  |
| 9                | 1                | 0              | -1.557766               | 1.033200  | -1.329094 |
| 10               | 6                | 0              | -2.329595               | 1.424670  | 0.581410  |
| 11               | 1                | 0              | -2.409162               | 2.495590  | 0.434305  |
| 12               | 1                | 0              | -2.645173               | 1.033878  | 1.545153  |
| 13               | 6                | 0              | 1.595475                | -2.160974 | 0.222507  |
| 14               | 1                | 0              | 2.412335                | -1.971704 | 0.920951  |
| 15               | 1                | 0              | 1.158728                | -3.137646 | 0.434204  |
| 16               | 1                | 0              | 1.988833                | -2.161365 | -0.795150 |
| 17               | 8                | 0              | 1.964110                | 2.413185  | -0.225161 |
| 18               | 7                | 0              | 1.516715                | 1.308809  | -0.039289 |

---

**TS2B**

---

| Center<br>Number | Atomic<br>Number | Atomic<br>Type | Coordinates (Angstroms) |           |           |
|------------------|------------------|----------------|-------------------------|-----------|-----------|
|                  |                  |                | X                       | Y         | Z         |
| 1                | 6                | 0              | 1.407096                | -0.333638 | -0.372919 |
| 2                | 8                | 0              | 1.492928                | 1.066487  | -0.188972 |
| 3                | 6                | 0              | 0.235327                | 1.710933  | -0.352184 |
| 4                | 6                | 0              | -0.789996               | 1.076501  | 0.560318  |
| 5                | 6                | 0              | 0.011997                | -0.724827 | -0.010982 |
| 6                | 1                | 0              | 1.546029                | -0.575698 | -1.435895 |
| 7                | 1                | 0              | 0.413244                | 2.752979  | -0.083154 |
| 8                | 1                | 0              | -0.101619               | 1.671301  | -1.397733 |
| 9                | 1                | 0              | -0.497423               | 1.054858  | 1.608960  |
| 10               | 6                | 0              | -2.115572               | 0.939967  | 0.268148  |
| 11               | 1                | 0              | -2.847925               | 0.767475  | 1.044042  |
| 12               | 1                | 0              | -2.492929               | 1.115221  | -0.733365 |
| 13               | 6                | 0              | 2.477671                | -1.006358 | 0.465859  |
| 14               | 1                | 0              | 2.466620                | -2.085770 | 0.303709  |
| 15               | 1                | 0              | 3.455292                | -0.614988 | 0.179257  |
| 16               | 1                | 0              | 2.309997                | -0.800311 | 1.524162  |
| 17               | 8                | 0              | -2.141346               | -1.455054 | -0.162717 |
| 18               | 7                | 0              | -0.917583               | -1.450284 | -0.220844 |

---

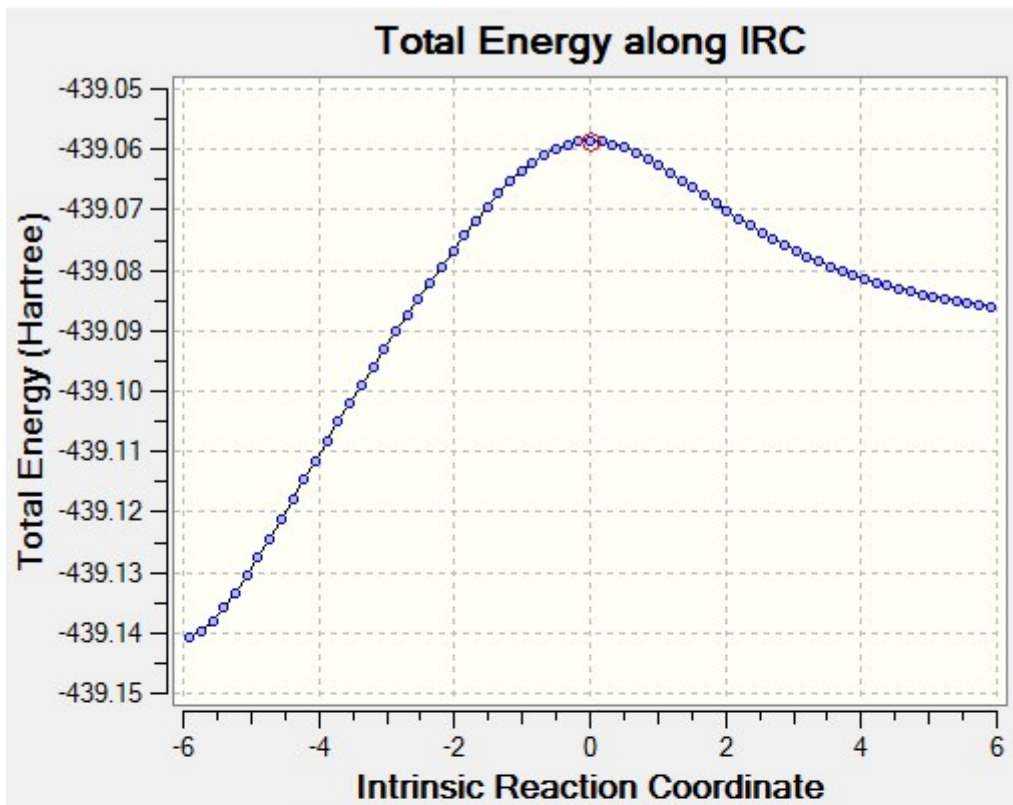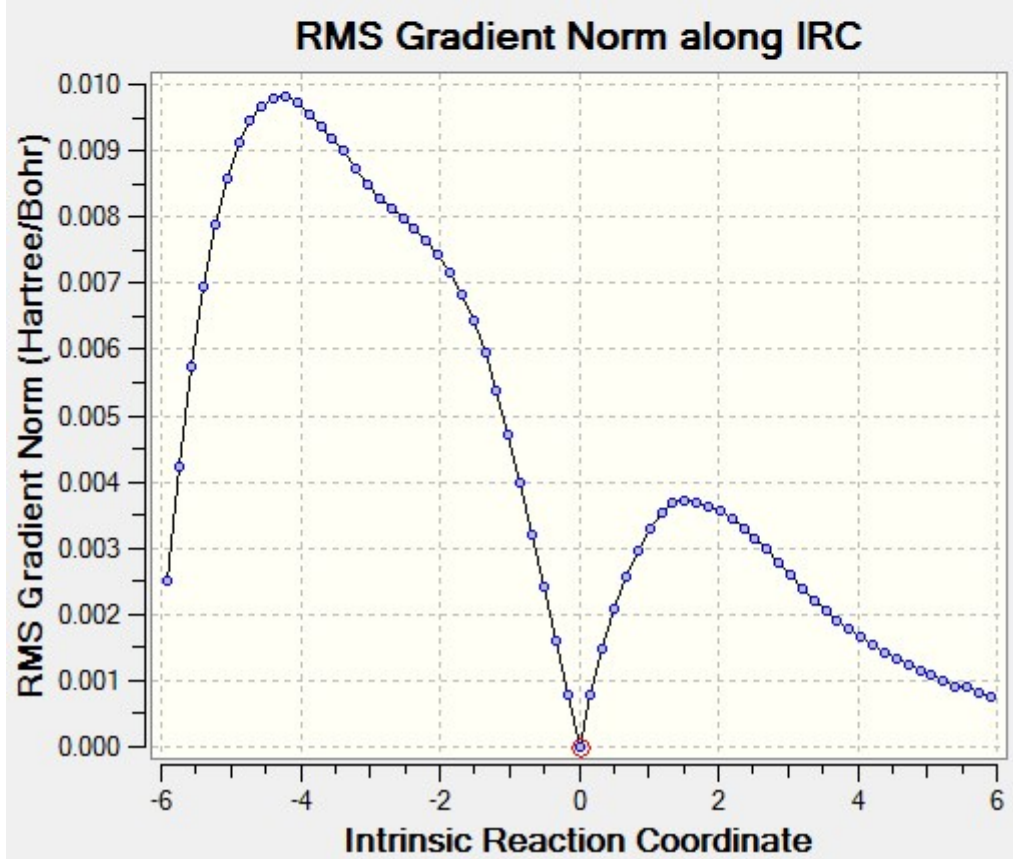

**[2] Energetical parameters and geometrical parameters for key structures of domino-reactions leading from nitronates 1a-e into respective isoxazoline systems 2a-e according the  $\omega$ B97XD(PCM)/6-311G(d,p) calculations**

**Table S1.** Energetical parameters of domino-reactions leading from nitronates **1a-e** into respective isoxazoline systems **2a-e** according the  $\omega$ B97XD(PCM)/6-311G(d,p) calculations ( $\Delta H$ ,  $\Delta G$  are in kcal/mol;  $\Delta S$  are in cal/molK).

| Solvent      | R    | X | Path | Transition                                  | $\Delta H$ | $\Delta S$ | $\Delta G$ |
|--------------|------|---|------|---------------------------------------------|------------|------------|------------|
| Benzene      | Me   | O | A    | <b>1a</b> → <b>TS1A</b>                     | 16.5       | -8.7       | 19.1       |
|              |      |   |      | <b>1a</b> → <b>3a</b>                       | -25.9      | -9.5       | -23.0      |
|              |      |   |      | <b>1a</b> → <b>TS2A</b>                     | 19.1       | -9.7       | 22.0       |
|              |      |   |      | <b>1a</b> → <b>2a</b> +Me <sub>3</sub> SiOH | -38.8      | 35.0       | -49.3      |
|              |      |   | B    | <b>1a</b> → <b>TS1B</b>                     | 46.8       | 5.4        | 45.2       |
|              |      |   |      | <b>1a</b> → <b>4a</b> +Me <sub>3</sub> SiOH | -7.4       | 50.5       | -22.5      |
|              |      |   |      | <b>1a</b> → <b>TS2B</b>                     | 11.2       | 39.3       | -0.5       |
|              |      |   |      | <hr/>                                       |            |            |            |
| Acetone      | Me   | O | A    | <b>1a</b> → <b>TS1A</b>                     | 16.7       | -10.0      | 19.7       |
|              |      |   |      | <b>1a</b> → <b>3a</b>                       | -26.1      | -9.0       | -23.5      |
|              |      |   |      | <b>1a</b> → <b>TS2A</b>                     | 16.9       | -6.4       | 18.8       |
|              |      |   |      | <b>1a</b> → <b>2a</b> +Me <sub>3</sub> SiOH | -41.5      | 34.3       | -51.7      |
|              |      |   | B    | <b>1a</b> → <b>TS1B</b>                     | 44.6       | 4.5        | 43.2       |
|              |      |   |      | <b>1a</b> → <b>4a</b> +Me <sub>3</sub> SiOH | -9.7       | 49.0       | -24.3      |
|              |      |   |      | <b>1a</b> → <b>TS2B</b>                     | 9.4        | 38.8       | -2.2       |
|              |      |   |      | <hr/>                                       |            |            |            |
| Nitromethane | Me   | O | A    | <b>1a</b> → <b>TS1A</b>                     | 16.8       | -10.3      | 19.8       |
|              |      |   |      | <b>1a</b> → <b>3a</b>                       | -26.2      | -9.1       | -23.5      |
|              |      |   |      | <b>1a</b> → <b>TS2A</b>                     | 16.6       | -6.4       | 18.5       |
|              |      |   |      | <b>1a</b> → <b>2a</b> +Me <sub>3</sub> SiOH | -41.6      | 34.1       | -51.8      |
|              |      |   | B    | <b>1a</b> → <b>TS1B</b>                     | 44.4       | 4.1        | 43.2       |
|              |      |   |      | <b>1a</b> → <b>4a</b> +Me <sub>3</sub> SiOH | -9.8       | 48.7       | -24.4      |
|              |      |   |      | <b>1a</b> → <b>TS2B</b>                     | 9.2        | 38.5       | -2.2       |
|              |      |   |      | <hr/>                                       |            |            |            |
| Water        | Me   | O | A    | <b>1a</b> → <b>TS1A</b>                     | 16.8       | -10.7      | 20.0       |
|              |      |   |      | <b>1a</b> → <b>3a</b>                       | -26.2      | -8.9       | -23.5      |
|              |      |   |      | <b>1a</b> → <b>TS2A</b>                     | 16.5       | -6.4       | 18.4       |
|              |      |   |      | <b>1a</b> → <b>2a</b> +Me <sub>3</sub> SiOH | -41.7      | 33.7       | -51.8      |
|              |      |   | B    | <b>1a</b> → <b>TS1B</b>                     | 44.3       | 4.0        | 43.1       |
|              |      |   |      | <b>1a</b> → <b>4a</b> +Me <sub>3</sub> SiOH | -9.9       | 48.4       | -24.4      |
|              |      |   |      | <b>1a</b> → <b>TS2B</b>                     | 9.2        | 38.2       | -2.2       |
|              |      |   |      | <hr/>                                       |            |            |            |
| Benzene      | Me   | S | A    | <b>1b</b> → <b>TS1A</b>                     | 20.0       | -11.7      | 23.5       |
|              |      |   |      | <b>1b</b> → <b>3b</b>                       | -23.7      | -11.7      | -20.2      |
|              |      |   |      | <b>1b</b> → <b>TS2A</b>                     | 19.7       | -8.4       | 22.1       |
|              |      |   |      | <b>1b</b> → <b>2b</b> +Me <sub>3</sub> SiOH | -41.7      | 34.7       | -52.1      |
|              |      |   | B    | <b>1b</b> → <b>TS1B</b>                     | 48.2       | 5.1        | 46.7       |
|              |      |   |      | <b>1b</b> → <b>4b</b> +Me <sub>3</sub> SiOH | -7.2       | 44.7       | -20.5      |
|              |      |   |      | <b>1b</b> → <b>TS2B</b>                     | 12.1       | 38.5       | 0.6        |
|              |      |   |      | <hr/>                                       |            |            |            |
| Benzene      | i-Pr | S | A    | <b>1c</b> → <b>TS1A</b>                     | 19.7       | -11.9      | 23.2       |
|              |      |   |      | <b>1c</b> → <b>3c</b>                       | -24.4      | -13.6      | -20.4      |
|              |      |   |      | <b>1c</b> → <b>TS2A</b>                     | 17.5       | -9.8       | 20.5       |

|                |                 |      |          |                                 |       |       |       |
|----------------|-----------------|------|----------|---------------------------------|-------|-------|-------|
|                |                 |      |          | <b>1c→2c+Me<sub>3</sub>SiOH</b> | -45.8 | 32.3  | -55.4 |
|                |                 |      | <b>B</b> | <b>1c→TS1B</b>                  | 46.9  | 0.8   | 46.7  |
|                |                 |      |          | <b>1c→4c+Me<sub>3</sub>SiOH</b> | -9.8  | 46.5  | -23.7 |
|                |                 |      |          | <b>1c→TS2B</b>                  | 8.2   | 35.7  | -2.5  |
| Benzene        | Ph              | S    | <b>A</b> | <b>1d→TS1A</b>                  | 19.7  | -6.5  | 21.6  |
|                |                 |      |          | <b>1d→3d</b>                    | -25.8 | -8.5  | -23.3 |
|                |                 |      |          | <b>1d→TS2A</b>                  | 18.0  | -7.9  | 20.4  |
|                |                 |      |          | <b>1d→2d+Me<sub>3</sub>SiOH</b> | -43.9 | 39.0  | -55.5 |
|                |                 |      | <b>B</b> | <b>1d→TS1B</b>                  | 48.2  | 5.4   | 46.6  |
|                |                 |      |          | <b>1d→4d+Me<sub>3</sub>SiOH</b> | -8.6  | 50.6  | -23.7 |
| <b>1d→TS2B</b> | 10.1            | 41.0 |          | -2.1                            |       |       |       |
| Benzene        | NO <sub>2</sub> | S    | <b>A</b> | <b>1e→TS1A</b>                  | 20.6  | -10.4 | 23.7  |
|                |                 |      |          | <b>1e→3e</b>                    | -24.4 | -12.2 | -20.7 |
|                |                 |      |          | <b>1e→TS2A</b>                  | 17.3  | -10.8 | 20.5  |
|                |                 |      |          | <b>1e→2e+Me<sub>3</sub>SiOH</b> | -45.4 | 34.3  | -55.7 |
|                |                 |      | <b>B</b> | <b>1e→TS1B</b>                  | 52.7  | 10.4  | 49.6  |
|                |                 |      |          | <b>1e→4e+Me<sub>3</sub>SiOH</b> | -7.6  | 46.0  | -21.3 |
| <b>1e→TS2B</b> | 10.3            | 38.2 |          | -1.1                            |       |       |       |

**Table S2.** Geometrical parameters for key structures of domino-reactions leading from nitronates **1a-e** into respective isoxazoline systems **2a-e** according the  $\omega$ B97XD(PCM)/6-311G(d,p) calculations.

| Solvent       | R           | X     | Structure            | Interatomic distance [ $\text{\AA}$ ] |       |       |       |       |       |       |       |
|---------------|-------------|-------|----------------------|---------------------------------------|-------|-------|-------|-------|-------|-------|-------|
|               |             |       |                      | O1-N2                                 | N2-C3 | C3-C4 | C4-C5 | C5-O1 | N2-O6 | O6-H7 | H7-C3 |
| Benzene       | Me          | O     | <b>1a</b>            | 1.246                                 | 1.294 | 2.978 | 1.327 | 3.212 | 1.378 | 2.368 | 1.079 |
|               |             |       | <b>TS1A</b>          | 1.262                                 | 1.336 | 2.074 | 1.381 | 2.169 | 1.394 | 2.371 | 1.085 |
|               |             |       | <b>3a</b>            | 1.398                                 | 1.471 | 1.546 | 1.524 | 1.438 | 1.425 | 2.346 | 1.088 |
|               |             |       | <b>TS2A</b>          | 1.266                                 | 1.407 | 1.527 | 1.508 | 1.482 | 2.323 | 1.522 | 1.176 |
|               |             |       | Me <sub>3</sub> SiOH |                                       |       |       |       |       |       | 0.956 |       |
|               |             |       | <b>2a</b>            | 1.403                                 | 1.265 | 1.499 | 1.517 | 1.452 |       |       |       |
|               |             |       | <b>TS1B</b>          | 1.158                                 | 1.232 | 2.987 | 1.327 | 3.392 | 2.311 | 1.557 | 1.159 |
|               |             |       | <b>4a</b>            | 1.206                                 | 1.155 | 3.019 | 1.326 | 4.479 |       |       |       |
|               | <b>TS2B</b> | 1.225 | 1.198                | 2.053                                 | 1.364 | 2.434 |       |       |       |       |       |
| Acetone       | Me          | O     | <b>1a</b>            | 1.249                                 | 1.293 | 2.976 | 1.327 | 3.290 | 1.377 | 2.371 | 1.080 |
|               |             |       | <b>TS1A</b>          | 1.263                                 | 1.336 | 2.072 | 1.381 | 2.176 | 1.394 | 2.373 | 1.085 |
|               |             |       | <b>3a</b>            | 1.398                                 | 1.472 | 1.545 | 1.523 | 1.441 | 1.425 | 2.349 | 1.088 |
|               |             |       | <b>TS2A</b>          | 1.254                                 | 1.411 | 1.528 | 1.507 | 1.494 | 2.440 | 1.607 | 1.159 |
|               |             |       | Me <sub>3</sub> SiOH |                                       |       |       |       |       |       | 0.957 |       |
|               |             |       | <b>2a</b>            | 1.406                                 | 1.265 | 1.497 | 1.516 | 1.516 |       |       |       |
|               |             |       | <b>TS1B</b>          | 1.153                                 | 1.232 | 3.035 | 1.327 | 3.384 | 2.390 | 1.648 | 1.138 |
|               |             |       | <b>4a</b>            | 1.211                                 | 1.153 | 3.032 | 1.327 | 4.529 |       |       |       |
|               | <b>TS2B</b> | 1.230 | 1.197                | 2.044                                 | 1.364 | 2.466 |       |       |       |       |       |
| Nitro-methane | Me          | O     | <b>1a</b>            | 1.249                                 | 1.293 | 2.975 | 1.327 | 3.295 | 1.376 | 2.371 | 1.080 |
|               |             |       | <b>TS1A</b>          | 1.263                                 | 1.336 | 2.072 | 1.381 | 2.176 | 1.394 | 2.373 | 1.085 |
|               |             |       | <b>3a</b>            | 1.398                                 | 1.472 | 1.545 | 1.523 | 1.441 | 1.425 | 2.349 | 1.088 |
|               |             |       | <b>TS2A</b>          | 1.253                                 | 1.412 | 1.528 | 1.506 | 1.495 | 2.448 | 1.614 | 1.157 |

|         |                 |   |                      |       |       |       |       |       |       |             |
|---------|-----------------|---|----------------------|-------|-------|-------|-------|-------|-------|-------------|
|         |                 |   | Me <sub>3</sub> SiOH |       |       |       |       |       |       | 0.957       |
|         |                 |   | <b>2a</b>            | 0.957 | 1.265 | 1.497 | 1.516 | 1.455 |       |             |
|         |                 |   | <b>TS1B</b>          | 1.153 | 1.232 | 3.039 | 1.327 | 3.377 | 2.398 | 1.659 1.135 |
|         |                 |   | <b>4a</b>            | 1.212 | 1.153 | 3.032 | 1.327 | 4.530 |       |             |
|         |                 |   | <b>TS2B</b>          | 1.231 | 1.197 | 2.044 | 1.364 | 2.469 |       |             |
| Water   | Me              | O | <b>1a</b>            | 1.249 | 1.293 | 2.975 | 1.327 | 3.301 | 1.376 | 2.371 1.080 |
|         |                 |   | <b>TS1A</b>          | 1.264 | 1.336 | 2.072 | 1.381 | 2.177 | 1.394 | 2.373 1.085 |
|         |                 |   | <b>3a</b>            | 1.398 | 1.472 | 1.545 | 1.523 | 1.441 | 1.425 | 2.350 1.088 |
|         |                 |   | <b>TS2A</b>          | 1.252 | 1.412 | 1.528 | 1.506 | 1.495 | 2.455 | 1.620 1.156 |
|         |                 |   | Me <sub>3</sub> SiOH |       |       |       |       |       |       | 0.957       |
|         |                 |   | <b>2a</b>            | 1.406 | 1.265 | 1.497 | 1.516 | 1.455 |       |             |
|         |                 |   | <b>TS1B</b>          | 1.152 | 1.232 | 3.041 | 1.327 | 3.371 | 2.403 | 1.667 1.134 |
|         |                 |   | <b>4a</b>            | 1.212 | 1.153 | 3.033 | 1.327 | 4.531 |       |             |
|         |                 |   | <b>TS2B</b>          | 1.231 | 1.197 | 2.043 | 1.364 | 2.470 |       |             |
| Benzene | Me              | S | <b>1b</b>            | 1.251 | 1.294 | 3.341 | 1.327 | 3.328 | 1.374 | 2.366 1.079 |
|         |                 |   | <b>TS1A</b>          | 1.264 | 1.340 | 2.109 | 1.383 | 2.143 | 1.394 | 2.370 1.085 |
|         |                 |   | <b>3b</b>            | 1.398 | 1.476 | 1.551 | 1.527 | 1.437 | 1.425 | 2.333 1.088 |
|         |                 |   | <b>TS2A</b>          | 1.270 | 1.412 | 1.528 | 1.512 | 1.478 | 2.275 | 1.518 1.185 |
|         |                 |   | <b>2b</b>            | 1.393 | 1.267 | 1.501 | 1.524 | 1.450 |       |             |
|         |                 |   | <b>TS1B</b>          | 1.159 | 1.236 | 3.154 | 1.327 | 3.211 | 2.299 | 1.533 1.166 |
|         |                 |   | <b>4b</b>            | 1.207 | 1.154 | 3.166 | 1.327 | 4.170 |       |             |
|         |                 |   | <b>TS2B</b>          | 1.225 | 1.198 | 2.120 | 1.364 | 2.365 |       |             |
| Benzene | i-Pr            | S | <b>1c</b>            | 1.252 | 1.294 | 3.338 | 1.327 | 3.331 | 1.374 | 2.362 1.079 |
|         |                 |   | <b>TS1A</b>          | 1.264 | 1.340 | 2.103 | 1.383 | 2.149 | 1.395 | 2.364 1.083 |
|         |                 |   | <b>3c</b>            | 1.398 | 1.477 | 1.551 | 1.526 | 1.436 | 1.425 | 2.314 1.087 |
|         |                 |   | <b>TS2A</b>          | 1.270 | 1.413 | 1.526 | 1.511 | 1.479 | 2.276 | 1.524 1.183 |
|         |                 |   | <b>2c</b>            | 1.391 | 1.268 | 1.501 | 1.525 | 1.450 |       |             |
|         |                 |   | <b>TS1B</b>          | 1.160 | 1.236 | 3.208 | 1.327 | 3.210 | 2.306 | 1.535 1.165 |
|         |                 |   | <b>4c</b>            | 1.208 | 1.154 | 3.210 | 1.327 | 4.443 |       |             |
|         |                 |   | <b>TS2B</b>          | 1.224 | 1.198 | 2.121 | 1.364 | 2.363 |       |             |
| Benzene | Ph              | S | <b>1d</b>            | 1.251 | 1.294 | 3.349 | 1.327 | 3.330 | 1.373 | 2.368 1.078 |
|         |                 |   | <b>TS1A</b>          | 1.263 | 1.339 | 2.106 | 1.383 | 2.147 | 1.392 | 2.375 1.084 |
|         |                 |   | <b>3d</b>            | 1.394 | 1.473 | 1.549 | 1.529 | 1.438 | 1.425 | 2.344 1.087 |
|         |                 |   | <b>TS2A</b>          | 1.270 | 1.413 | 1.529 | 1.513 | 1.478 | 2.263 | 1.526 1.175 |
|         |                 |   | <b>2d</b>            | 1.389 | 1.266 | 1.499 | 1.526 | 1.451 |       |             |
|         |                 |   | <b>TS1B</b>          | 1.159 | 1.235 | 3.100 | 1.327 | 3.235 | 2.298 | 1.525 1.166 |
|         |                 |   | <b>4d</b>            | 1.206 | 1.154 | 3.149 | 1.327 | 3.947 |       |             |
|         |                 |   | <b>TS2B</b>          | 1.223 | 1.200 | 2.123 | 1.365 | 2.349 |       |             |
| Benzene | NO <sub>2</sub> | S | <b>1e</b>            | 1.241 | 1.301 | 3.299 | 1.327 | 3.133 | 1.364 | 2.387 1.077 |
|         |                 |   | <b>TS1A</b>          | 1.260 | 1.341 | 2.117 | 1.384 | 2.123 | 1.383 | 2.390 1.082 |
|         |                 |   | <b>3e</b>            | 1.397 | 1.474 | 1.548 | 1.527 | 1.436 | 1.418 | 2.333 1.086 |
|         |                 |   | <b>TS2A</b>          | 1.271 | 1.416 | 1.525 | 1.518 | 1.476 | 2.207 | 1.448 1.212 |
|         |                 |   | <b>2e</b>            | 1.371 | 1.267 | 1.497 | 1.528 | 1.458 |       |             |
|         |                 |   | <b>TS1B</b>          | 1.158 | 1.238 | 4.395 | 1.329 | 5.236 | 2.208 | 1.451 1.194 |
|         |                 |   | <b>4e</b>            | 1.194 | 1.155 | 4.358 | 1.329 | 6.889 |       |             |
|         |                 |   | <b>TS2B</b>          | 1.213 | 1.197 | 2.126 | 1.362 | 2.442 |       |             |



**[3] Energetical parameters for key structures of domino-reactions leading from nitronate 1a into isoxazoline 2a according the different calculations**

**Table S3.** Kinetic and thermodynamic parameters of domino-reactions leading from nitronate **1a** into isoxazoline **2a** computed at 25°C in benzene, according to different functionals and basic sets ( $\Delta H$  and  $\Delta G$  values are in kcal/mol;  $\Delta S$  values are in cal·mol<sup>-1</sup>·K<sup>-1</sup>).

| Functional     | Basic set    | Path                                        | $\Delta H$                                  | $\Delta G$ | $\Delta S$ |       |
|----------------|--------------|---------------------------------------------|---------------------------------------------|------------|------------|-------|
| $\omega$ B97XD | 6-31G(d)     | A                                           | <b>1a</b> → <b>TS1A</b>                     | 15.1       | 18.1       | -10.2 |
|                |              |                                             | <b>1a</b> → <b>3a</b>                       | -30.1      | -26.9      | -10.7 |
|                |              |                                             | <b>1a</b> → <b>TS2A</b>                     | 18.2       | 20.0       | -6.0  |
|                |              |                                             | <b>1a</b> → <b>2a</b> +Me <sub>3</sub> SiOH | -37.4      | -47.7      | 34.6  |
|                |              | B                                           | <b>1a</b> → <b>TS1B</b>                     | 50.9       | 49.4       | 4.9   |
|                |              |                                             | <b>1a</b> → <b>4a</b> +Me <sub>3</sub> SiOH | -1.2       | -15.9      | 49.1  |
|                |              |                                             | <b>4a</b> → <b>TS2B</b>                     | 17.4       | 20.4       | -10.2 |
|                | 6-31++G(d,p) | A                                           | <b>1a</b> → <b>TS1A</b>                     | 16.2       | 18.7       | -8.5  |
|                |              |                                             | <b>1a</b> → <b>3a</b>                       | -28.0      | -25.3      | -9.1  |
|                |              |                                             | <b>1a</b> → <b>TS2A</b>                     | 18.3       | 20.2       | -6.3  |
|                |              |                                             | <b>1a</b> → <b>2a</b> +Me <sub>3</sub> SiOH | -41.4      | -52.0      | 35.4  |
|                |              | B                                           | <b>1a</b> → <b>TS1B</b>                     | 49.3       | 47.5       | 6.2   |
|                |              |                                             | <b>1a</b> → <b>4a</b> +Me <sub>3</sub> SiOH | -6.6       | -21.5      | 50.0  |
|                |              |                                             | <b>4a</b> → <b>TS2B</b>                     | 17.8       | 20.7       | -9.9  |
| MPWB1K         | 6-31G(d)     | A                                           | <b>1a</b> → <b>TS1A</b>                     | 14.8       | 18.2       | -11.4 |
|                |              |                                             | <b>1a</b> → <b>3a</b>                       | -34.1      | -30.7      | -11.6 |
|                |              |                                             | <b>1a</b> → <b>TS2A</b>                     | 18.2       | 20.0       | -5.9  |
|                |              |                                             | <b>1a</b> → <b>2a</b> +Me <sub>3</sub> SiOH | -43.6      | -54.0      | 34.8  |
|                |              | B                                           | <b>1a</b> → <b>TS1B</b>                     | 55.0       | 54.0       | 3.5   |
|                |              |                                             | <b>1a</b> → <b>4a</b> +Me <sub>3</sub> SiOH | -4.2       | -18.0      | 48.3  |
|                |              |                                             | <b>4a</b> → <b>TS2B</b>                     | 17.9       | 20.8       | -9.8  |
|                | 6-311G(d,p)  | A                                           | <b>1a</b> → <b>TS1A</b>                     | 15.7       | 18.3       | -8.6  |
|                |              |                                             | <b>1a</b> → <b>3a</b>                       | -30.8      | -27.8      | -10.2 |
|                |              |                                             | <b>1a</b> → <b>TS2A</b>                     | 18.2       | 18.6       | -1.1  |
|                |              |                                             | <b>1a</b> → <b>2a</b> +Me <sub>3</sub> SiOH | -45.9      | -56.9      | 36.7  |
|                |              | B                                           | <b>1a</b> → <b>TS1B</b>                     | 50.5       | 48.0       | 8.5   |
|                |              |                                             | <b>1a</b> → <b>4a</b> +Me <sub>3</sub> SiOH | -9.7       | -24.8      | 50.8  |
|                |              |                                             | <b>4a</b> → <b>TS2B</b>                     | 18.9       | 21.9       | -10.2 |
| 6-31++G(d,p)   | A            | <b>1a</b> → <b>TS1A</b>                     | 15.7                                        | 18.8       | -10.5      |       |
|                |              | <b>1a</b> → <b>3a</b>                       | -32.1                                       | -28.8      | -11.2      |       |
|                |              | <b>1a</b> → <b>TS2A</b>                     | 18.1                                        | 19.0       | -3.0       |       |
|                |              | <b>1a</b> → <b>2a</b> +Me <sub>3</sub> SiOH | -48.0                                       | -58.7      | 35.9       |       |
|                | B            | <b>1a</b> → <b>TS1B</b>                     | 53.2                                        | 51.4       | 6.1        |       |
|                |              | <b>1a</b> → <b>4a</b> +Me <sub>3</sub> SiOH | -9.5                                        | -24.4      | 50.1       |       |
|                |              | <b>4a</b> → <b>TS2B</b>                     | 18.3                                        | 21.3       | -10.0      |       |
| B3LYP          | 6-31G(d)     | A                                           | <b>1a</b> → <b>TS1A</b>                     | 15.4       | 18.7       | -10.9 |
|                |              |                                             | <b>1a</b> → <b>3a</b>                       | -22.2      | -18.3      | -13.0 |
|                |              |                                             | <b>1a</b> → <b>TS2A</b>                     | 17.9       | 19.9       | -6.5  |
|                |              |                                             | <b>1a</b> → <b>2a</b> +Me <sub>3</sub> SiOH | -36.7      | -46.1      | 31.2  |
|                |              | B                                           | <b>1a</b> → <b>TS1B</b>                     | 42.4       | 40.7       | 5.8   |

|                |   |                                 |                                 |       |       |      |
|----------------|---|---------------------------------|---------------------------------|-------|-------|------|
|                |   | <b>1a→4a+Me<sub>3</sub>SiOH</b> | -8.0                            | -21.9 | 46.4  |      |
|                |   | <b>4a→TS2B</b>                  | 16.4                            | 19.8  | -11.4 |      |
| 6-311G(d,p)    | A | <b>1a→TS1A</b>                  | 17.1                            | 20.6  | -11.9 |      |
|                |   | <b>1a→3a</b>                    | -17.3                           | -13.3 | -13.4 |      |
|                |   | <b>1a→TS2A</b>                  | 19.9                            | 22.2  | -7.8  |      |
|                |   |                                 | <b>1a→2a+Me<sub>3</sub>SiOH</b> | -38.1 | -47.2 | 30.6 |
|                | B | <b>1a→TS1B</b>                  | 40.5                            | 39.7  | 4.3   |      |
|                |   | <b>1a→4a+Me<sub>3</sub>SiOH</b> | -14.5                           | -28.2 | 46.0  |      |
| <b>4a→TS2B</b> |   | 17.7                            | 21.2                            | -11.6 |       |      |
| 6-31++G(d,p)   | A | <b>1a→TS1A</b>                  | 16.7                            | 20.5  | -12.5 |      |
|                |   | <b>1a→3a</b>                    | -19.5                           | -15.3 | -14.0 |      |
|                |   | <b>1a→TS2A</b>                  | 19.7                            | 19.2  | -6.3  |      |
|                |   |                                 | <b>1a→2a+Me<sub>3</sub>SiOH</b> | -41.1 | -50.2 | 30.3 |
|                | B | <b>1a→TS1B</b>                  | 41.8                            | 40.5  | 5.2   |      |
|                |   | <b>1a→4a+Me<sub>3</sub>SiOH</b> | -14.2                           | -27.7 | 45.5  |      |
| <b>4a→TS2B</b> |   | 16.9                            | 20.1                            | -10.7 |       |      |
